# Supplementary material for: Distinguishing liquid ammonia from sodium hydroxide mercerization in cotton textiles
Source: Springer Nature journal article supplement (doi:10.1007/s10570-022-04532-7), 2022-03-25
Supplement: MOESM2 [file 20255794]

## Sample loading for X-ray diffraction measurements

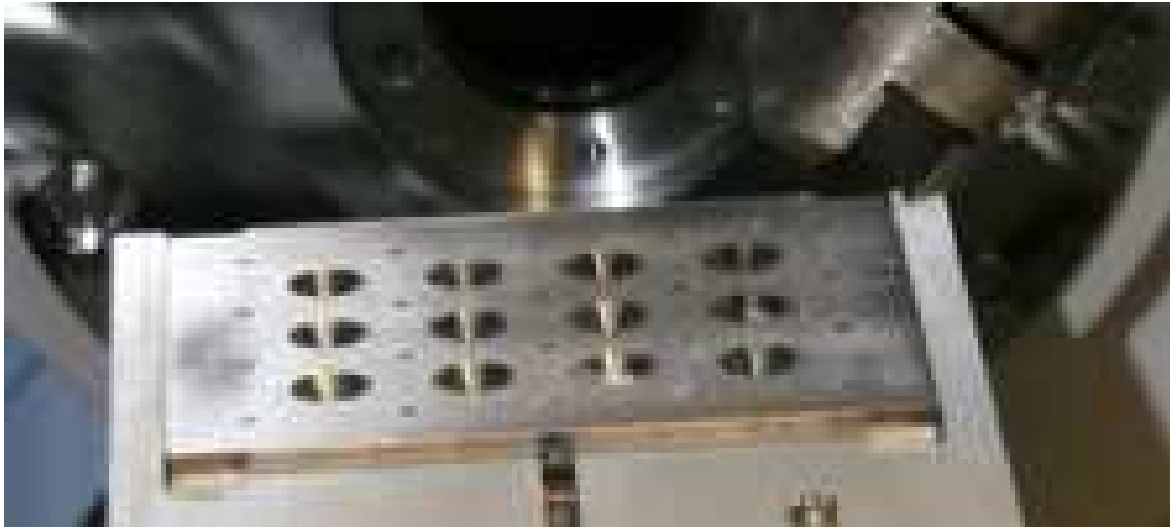

Photograph of aluminum block with depressed cavities, which functioned as the sample holder

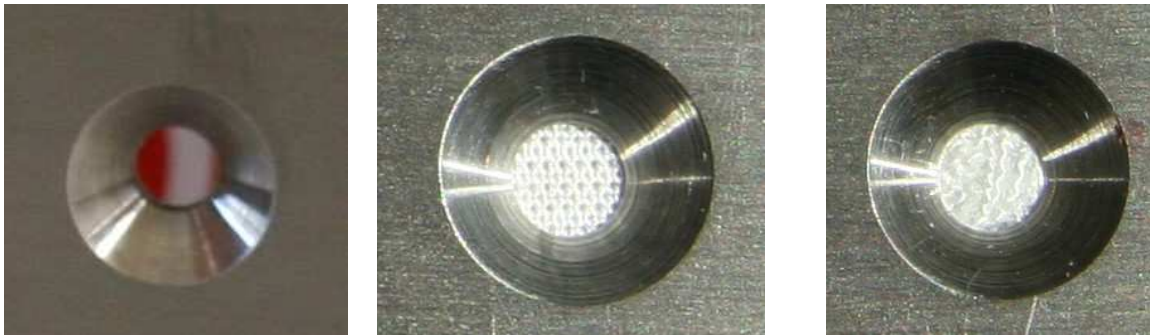

Photograph of individual cavities in the block illustrating the mode of sample loading:

- Left image: Sample holder cavity with no specimen. The hole punched out from the bottom can clearly be seen.
- Middle image: Sample holder cavity with fabric specimen. The specimen was simply placed on the reverse side to cover the hole and held in position with clamps.
- Right image: Sample holder cavity with fiber specimen. The fiber specimens were sandwiched between two 6  $\mu\text{m}$  Mylar® foils, and the assembly was placed on the reverse side to cover the hole and held in position with the clamps. The same principle was employed for measurements on powder specimens as well.
