# Supplementary material for: Distinguishing liquid ammonia from sodium hydroxide mercerization in cotton textiles
Source: Springer Nature journal article supplement (doi:10.1007/s10570-022-04532-7), 2022-03-25
Supplement: MOESM6 [file 20255794]

**Supplementary Table 1.** Principle components and their data variance explained, from analyses of X-ray diffractograms.

| Principal component | Fabric |           | Fiber  |           | Powder  |           |
|---------------------|--------|-----------|--------|-----------|---------|-----------|
|                     | R2X    | R2X (cum) | R2X    | R2X (cum) | R2X     | R2X (cum) |
| 1                   | 0.644  | 0.644     | 0.597  | 0.597     | 0.91    | 0.910     |
| 2                   | 0.216  | 0.860     | 0.254  | 0.851     | 0.0297  | 0.940     |
| 3                   | 0.0535 | 0.913     | 0.0426 | 0.894     | 0.0177  | 0.958     |
| 4                   | —      | —         | —      | —         | 0.00943 | 0.967     |

**Supplementary Table 2.** Principle components and their data variance explained, from analyses of fabric FTIR-ATR spectra – Results from the Invenio S spectrometer.

| Principal component | –OH stretch and fingerprint regions |           | –OH stretch region |           | Fingerprint region |           |
|---------------------|-------------------------------------|-----------|--------------------|-----------|--------------------|-----------|
|                     | R2X                                 | R2X (cum) | R2X                | R2X (cum) | R2X                | R2X (cum) |
| 1                   | 0.346                               | 0.346     | 0.365              | 0.365     | 0.415              | 0.415     |
| 2                   | 0.250                               | 0.596     | 0.291              | 0.656     | 0.173              | 0.588     |
| 3                   | 0.137                               | 0.734     | 0.136              | 0.791     | 0.133              | 0.721     |
| 4                   | 0.0614                              | 0.795     | 0.0557             | 0.847     | 0.0839             | 0.805     |
| 5                   | 0.0464                              | 0.841     | 0.032              | 0.879     | 0.0577             | 0.863     |
| 6                   | 0.0393                              | 0.881     | 0.0206             | 0.900     | 0.0443             | 0.907     |
| 7                   | 0.0228                              | 0.904     | 0.0114             | 0.911     | 0.024              | 0.931     |
| 8                   | 0.0176                              | 0.921     | 0.0103             | 0.921     | 0.0192             | 0.95      |
| 9                   | 0.0104                              | 0.932     | 0.0081             | 0.930     | 0.0116             | 0.962     |
| 10                  | 0.00903                             | 0.941     | 0.00655            | 0.936     | 0.00612            | 0.968     |
| 11                  | 0.00579                             | 0.946     | 0.00647            | 0.943     | 0.00452            | 0.973     |
| 12                  | 0.00492                             | 0.951     | —                  | —         | —                  | —         |
| 13                  | 0.00427                             | 0.956     | —                  | —         | —                  | —         |

**Supplementary Table 3.** Principle components and their data variance explained, from analyses of fabric FTIR-ATR spectra – Results from the Vertex 70 spectrometer.

| Principal component | –OH stretch and fingerprint regions |           | –OH stretch region |           | Fingerprint region |           |
|---------------------|-------------------------------------|-----------|--------------------|-----------|--------------------|-----------|
|                     | R2X                                 | R2X (cum) | R2X                | R2X (cum) | R2X                | R2X (cum) |
| 1                   | 0.333                               | 0.333     | 0.216              | 0.216     | 0.457              | 0.457     |
| 2                   | 0.131                               | 0.463     | 0.143              | 0.359     | 0.118              | 0.574     |
| 3                   | 0.0989                              | 0.562     | 0.12               | 0.479     | 0.08               | 0.654     |
| 4                   | 0.0631                              | 0.625     | 0.0713             | 0.550     | 0.0589             | 0.713     |
| 5                   | 0.06468                             | 0.672     | 0.0496             | 0.600     | 0.0492             | 0.762     |
| 6                   | 0.032                               | 0.704     | 0.0403             | 0.640     | 0.0252             | 0.788     |
| 7                   | 0.0269                              | 0.731     | 0.0325             | 0.673     | 0.0203             | 0.808     |
| 8                   | 0.0214                              | 0.752     | —                  | —         | 0.0161             | 0.824     |

**Supplementary Table 4.** Principle components and their data variance explained, from analyses of fabric FTIR-ATR spectra – Analysis of the region around 1107 cm<sup>-1</sup>.

| Principal component | Invenio S spectrometer |           | Vertex 70 spectrometer |           |
|---------------------|------------------------|-----------|------------------------|-----------|
|                     | R2X                    | R2X (cum) | R2X                    | R2X (cum) |
| 1                   | 0.671                  | 0.671     | 0.666                  | 0.666     |
| 2                   | 0.174                  | 0.845     | 0.149                  | 0.815     |
| 3                   | 0.088                  | 0.934     | 0.11                   | 0.925     |
| 4                   | 0.0282                 | 0.962     | 0.0302                 | 0.955     |
| 5                   | 0.228                  | 0.985     | 0.0171                 | 0.972     |
| 6                   | 0.00881                | 0.994     | 0.00989                | 0.982     |
| 7                   | 0.00393                | 0.998     | 0.00456                | 0.987     |
| 8                   | —                      | —         | 0.00327                | 0.990     |

**Supplementary Table 5.** Principle components and their data variance explained, from analyses of powder FTIR-ATR spectra – Analysis of the fingerprint region.

| Principal component | Invenio S spectrometer |           | Vertex 70 spectrometer |           |
|---------------------|------------------------|-----------|------------------------|-----------|
|                     | R2X                    | R2X (cum) | R2X                    | R2X (cum) |
| 1                   | 0.453                  | 0.453     | 0.364                  | 0.364     |
| 2                   | 0.255                  | 0.708     | 0.211                  | 0.575     |
| 3                   | 0.0815                 | 0.789     | 0.0858                 | 0.660     |
| 4                   | 0.0689                 | 0.858     | 0.0667                 | 0.727     |
| 5                   | 0.0444                 | 0.902     | 0.0433                 | 0.771     |
| 6                   | 0.0206                 | 0.923     | —                      | —         |

**Supplementary Table 6.** Principle components and their data variance explained, from analyses of FTIR transmittance spectra.

| Principal component | –OH stretch region |           | Fingerprint region |           |
|---------------------|--------------------|-----------|--------------------|-----------|
|                     | R2X                | R2X (cum) | R2X                | R2X (cum) |
| 1                   | 0.635              | 0.635     | 0.526              | 0.526     |
| 2                   | 0.147              | 0.782     | 0.249              | 0.776     |
| 3                   | 0.087              | 0.869     | 0.0766             | 0.852     |
| 4                   | 0.0545             | 0.924     | —                  | —         |
| 5                   | 0.0345             | 0.958     | —                  | —         |
| 6                   | 0.0181             | 0.977     | —                  | —         |
| 7                   | 0.00887            | 0.985     | —                  | —         |
| 8                   | 0.00566            | 0.991     | —                  | —         |
