# Supplementary material for: Distinguishing liquid ammonia from sodium hydroxide mercerization in cotton textiles
Source: Springer Nature journal article supplement (doi:10.1007/s10570-022-04532-7), 2022-03-25
Supplement: MOESM7 [file 20255794]

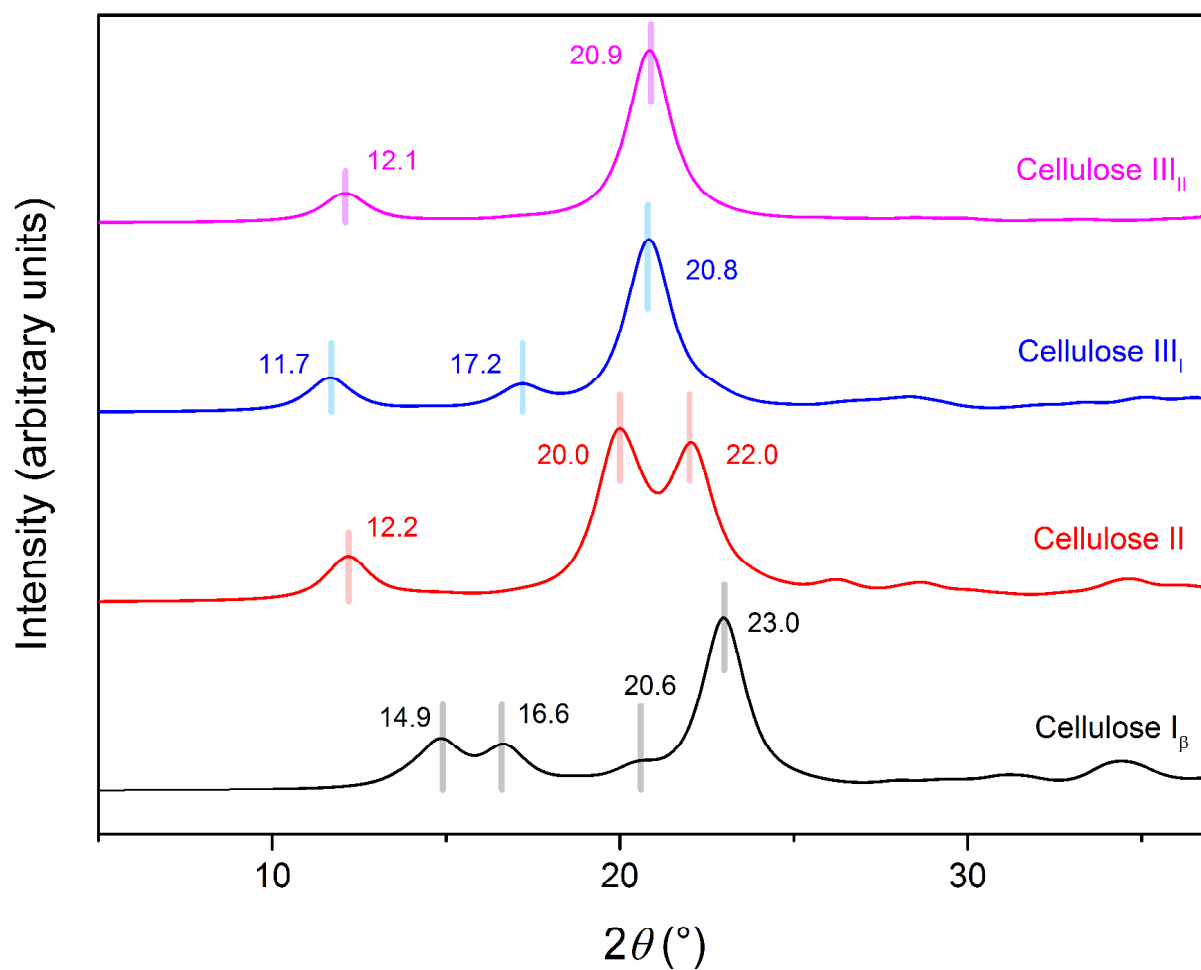

**Supplementary Figure 1.** Model X-ray diffractograms calculated for the different cellulose allomorphs, obtained from *French AD (2014) Idealized powder diffraction patterns for cellulose polymorphs. Cellulose 21 (2):885-896. <https://doi.org/10.1007/s10570-013-0030-4>*

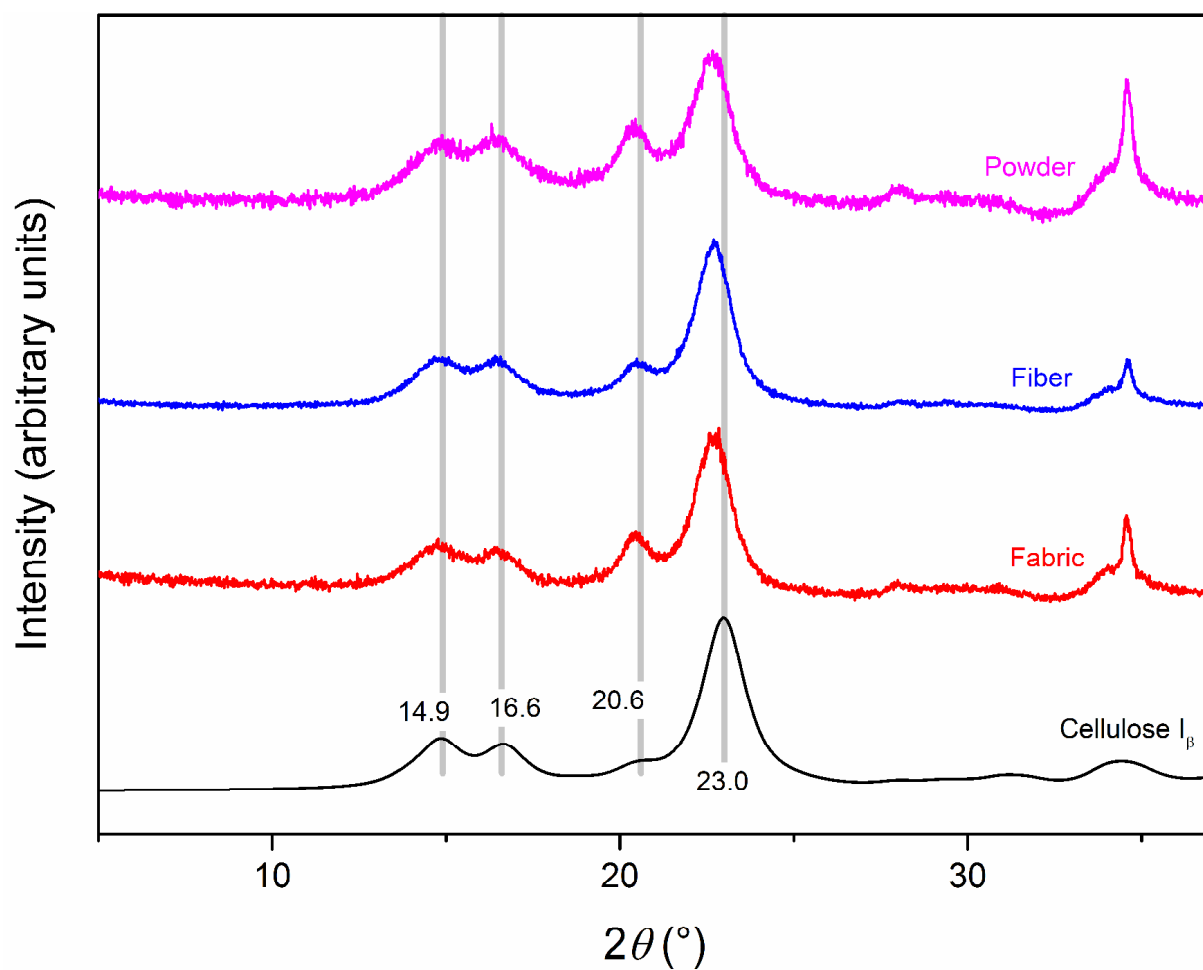

**Supplementary Figure 2.** Representative X-ray diffractograms measured on fabric, fiber and powder specimens of untreated samples. A model diffractogram of Cellulose I<sub>β</sub> is included for comparisons.

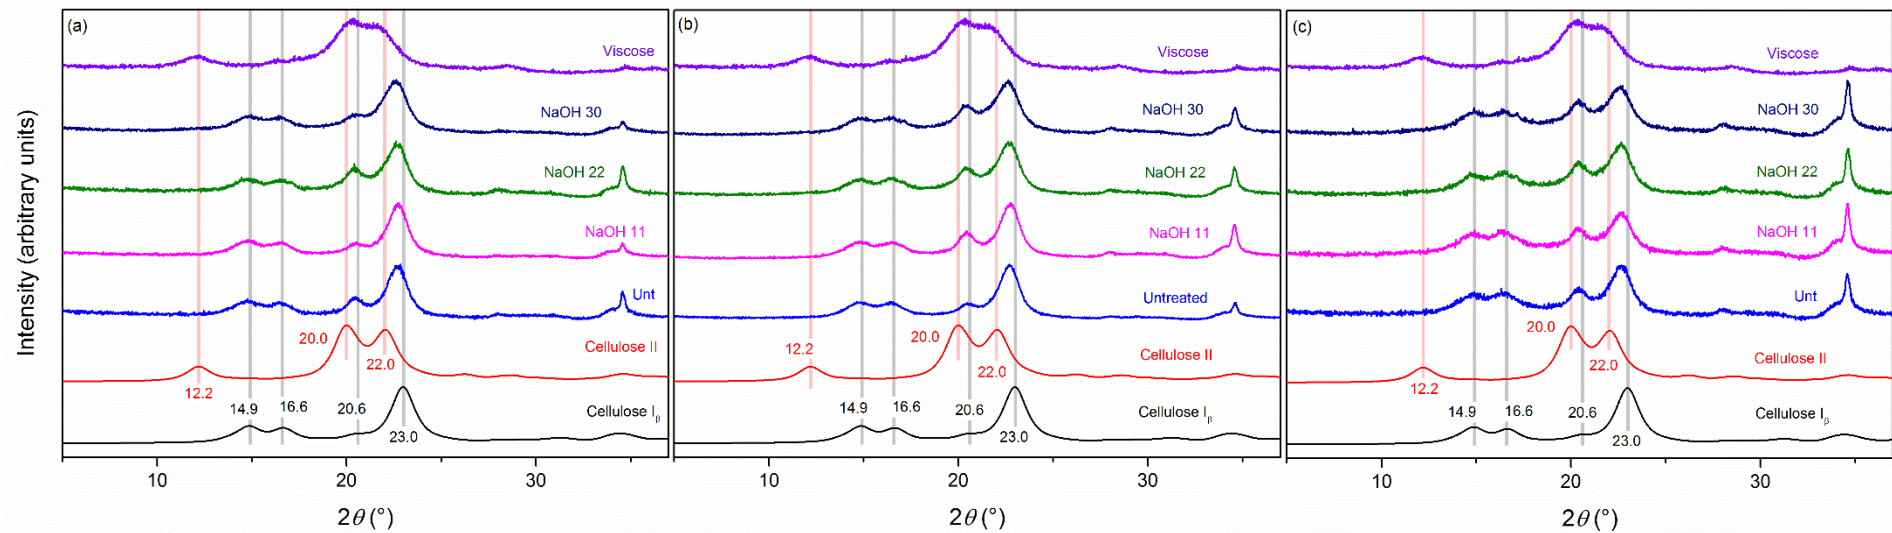

**Supplementary Figure 3.** X-ray diffractograms measured on (a) fabric, (b) fiber, (c) powder specimens from samples treated with 11% NaOH (w/w), 22% NaOH (w/w) and 30% NaOH (w/w). The plots include results from a viscose fabric (as reference), and model diffractograms of the Cellulose I<sub>β</sub> and II allomorphs for comparison.

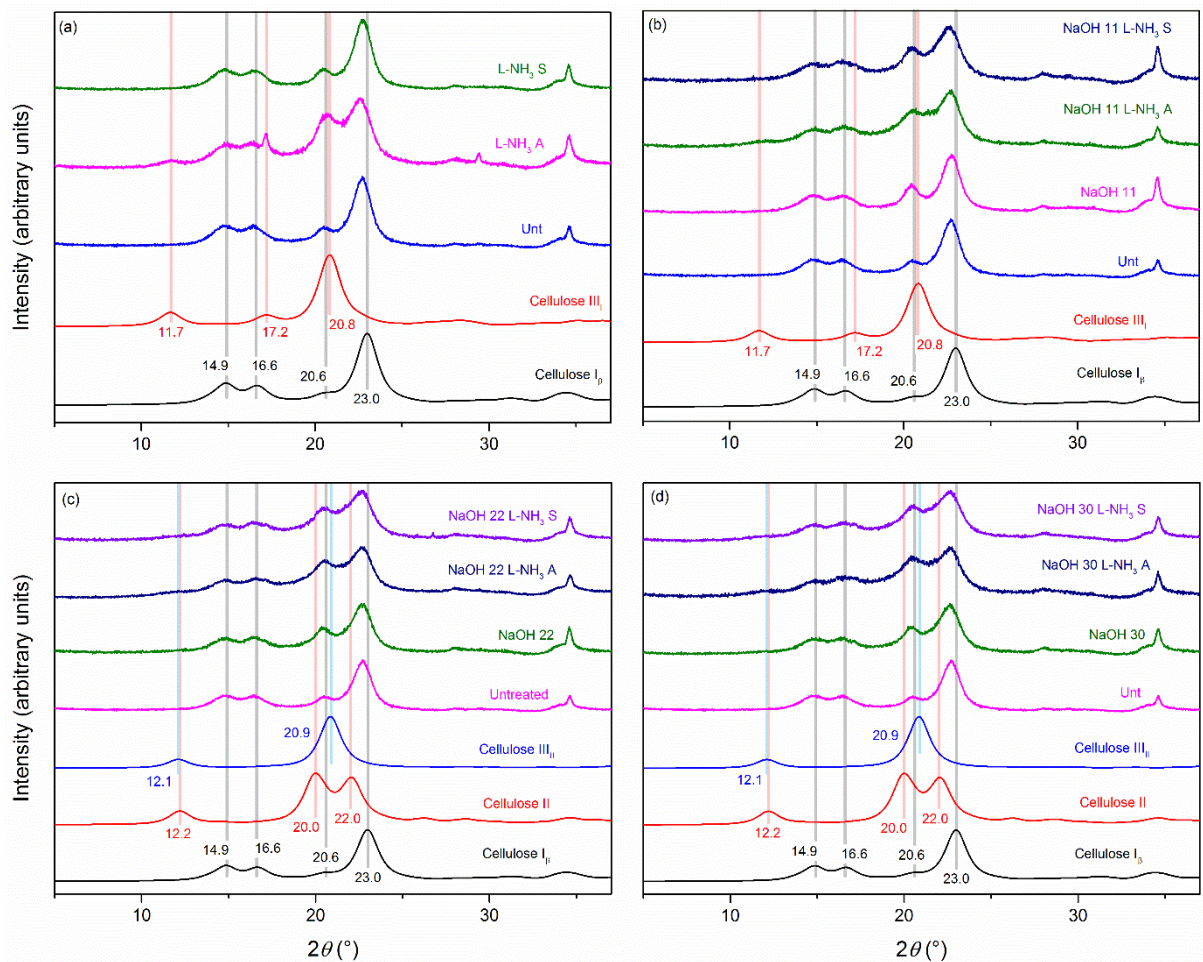

**Supplementary Figure 4.** Representative X-ray diffractograms from measurements on fiber specimens of samples treated with: (a) L-NH<sub>3</sub> alone (b) 11% NaOH (w/w), alone and followed by L-NH<sub>3</sub>, (c) 22% NaOH (w/w), alone and followed by L-NH<sub>3</sub>, (d) 30% NaOH (w/w), alone and followed by L-NH<sub>3</sub>. The results from untreated specimens and model diffractograms of the Cellulose I<sub>β</sub>, II, III<sub>I</sub> and III<sub>II</sub> allomorphs are included for comparison.

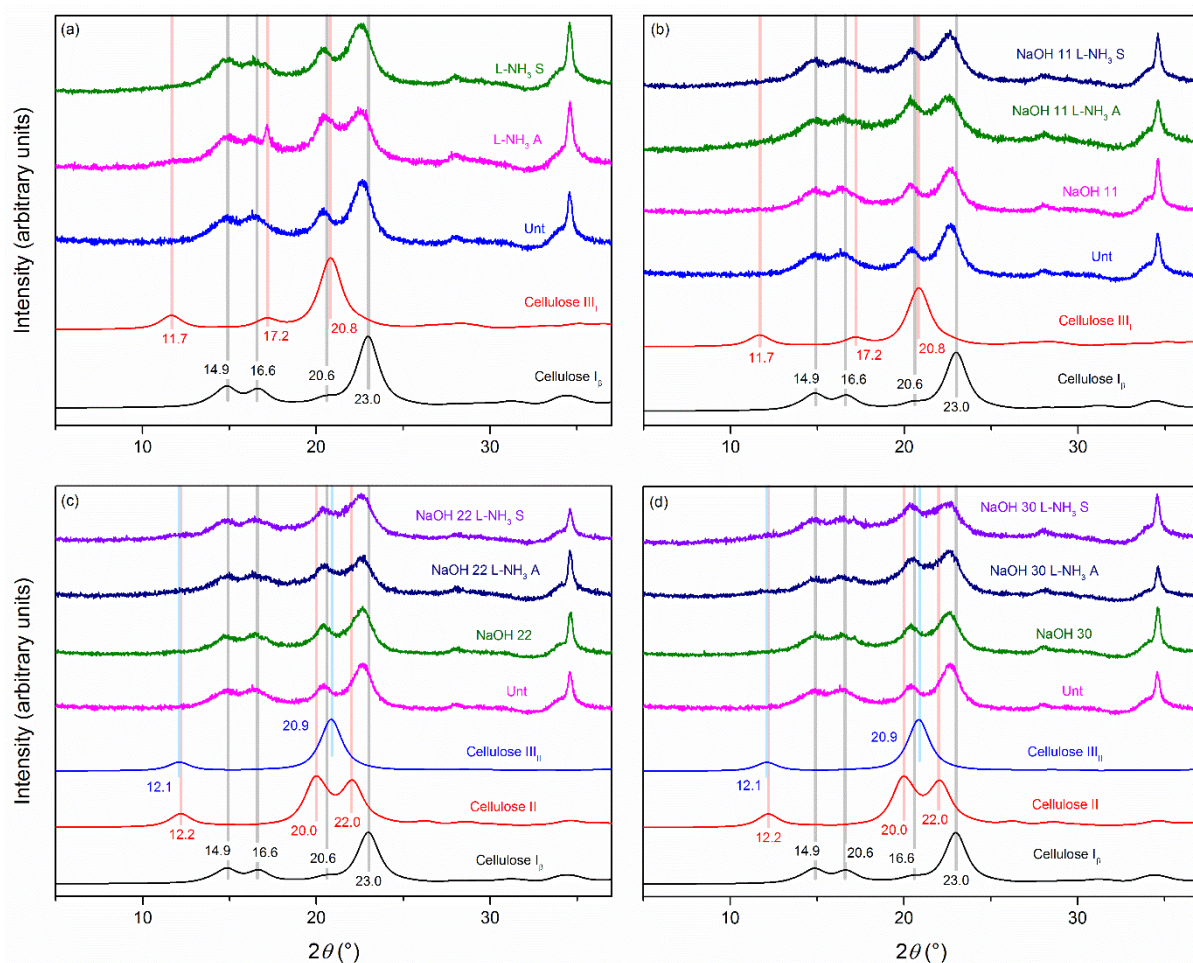

**Supplementary Figure 5.** Representative X-ray diffractograms from measurements on powder specimens of samples treated with: (a) L-NH<sub>3</sub> alone (b) 11% NaOH (w/w), alone and followed by L-NH<sub>3</sub>, (c) 22% NaOH (w/w), alone and followed by L-NH<sub>3</sub>, (d) 30% NaOH (w/w), alone and followed by L-NH<sub>3</sub>. The results from untreated specimens and model diffractograms of the Cellulose I<sub>β</sub>, II, III<sub>I</sub> and III<sub>II</sub> allomorphs are included for comparison.

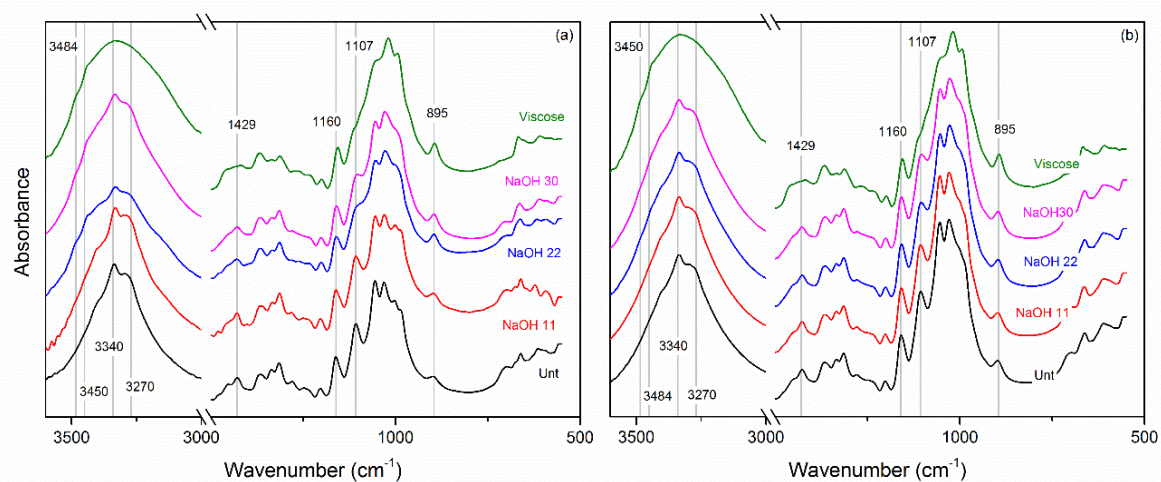

**Supplementary Figure 6.** Representative FTIR-ATR absorbance spectra measured on (a) fabric, (b) powder specimens from samples treated with 11% NaOH (w/w), 22% NaOH (w/w) and 30% NaOH (w/w). The plots also include results from a viscose fabric (as reference).

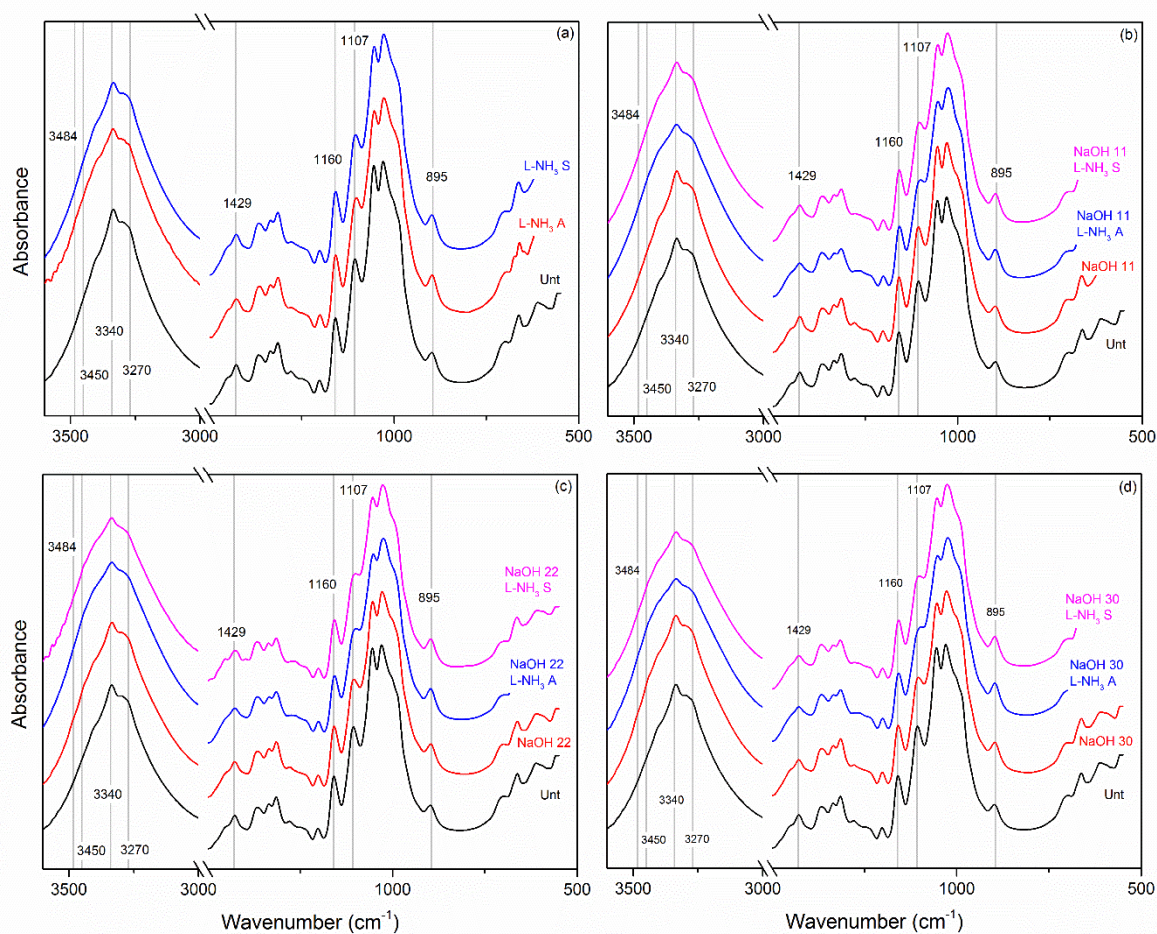

**Supplementary Figure 7.** Representative FTIR-ATR absorbance spectra from measurements on powder specimens of samples treated with: (a) L-NH<sub>3</sub> alone (b) 11% NaOH (w/w), alone and followed by L-NH<sub>3</sub>, (c) 22% NaOH (w/w), alone and followed by L-NH<sub>3</sub>, (d) 30% NaOH (w/w), alone and followed by L-NH<sub>3</sub>.

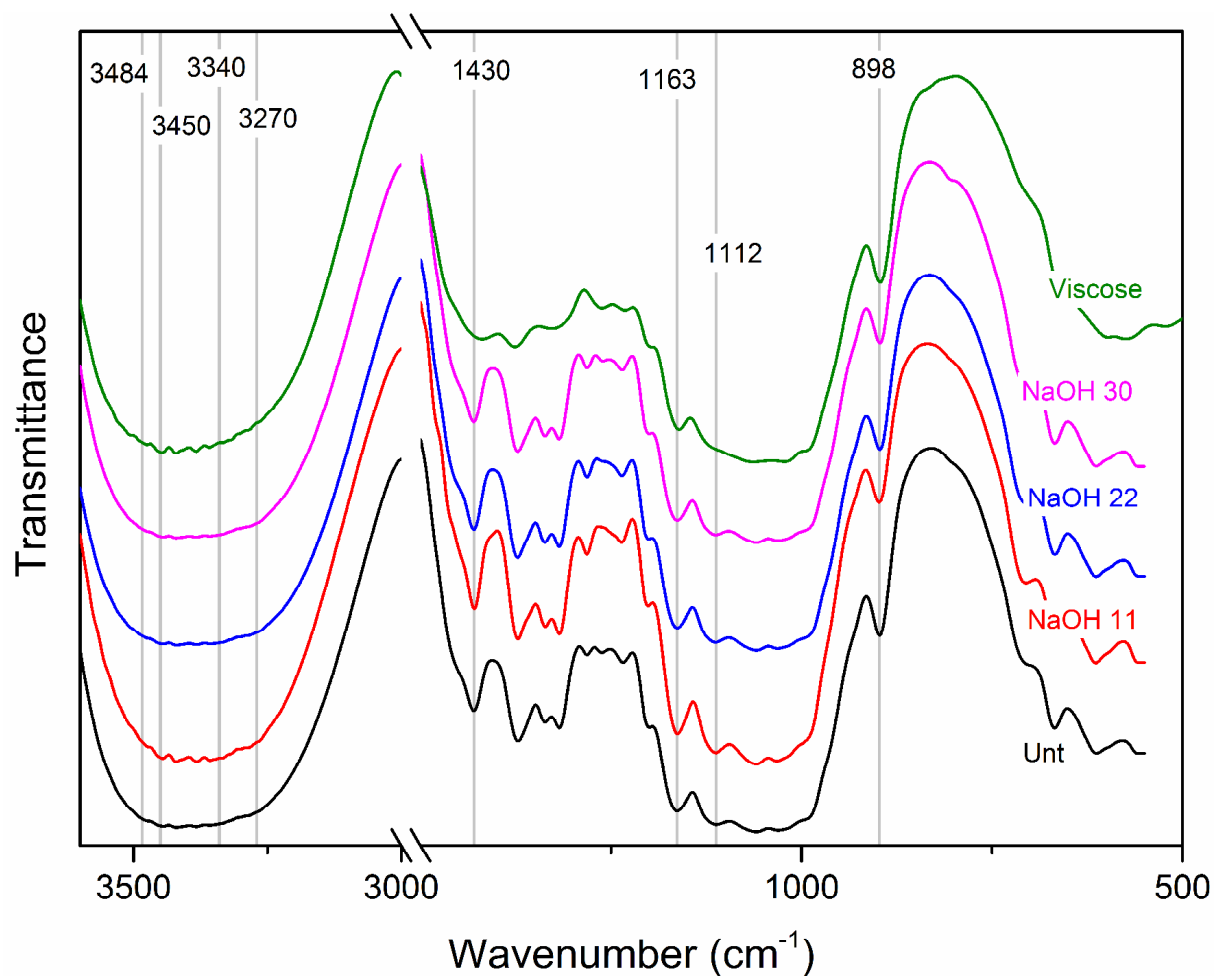

**Supplementary Figure 8.** FTIR transmittance measured with powder specimens from samples treated with 11% NaOH (w/w), 22% NaOH (w/w) and 30% NaOH (w/w). The plots also include results from a viscose powder (as reference).



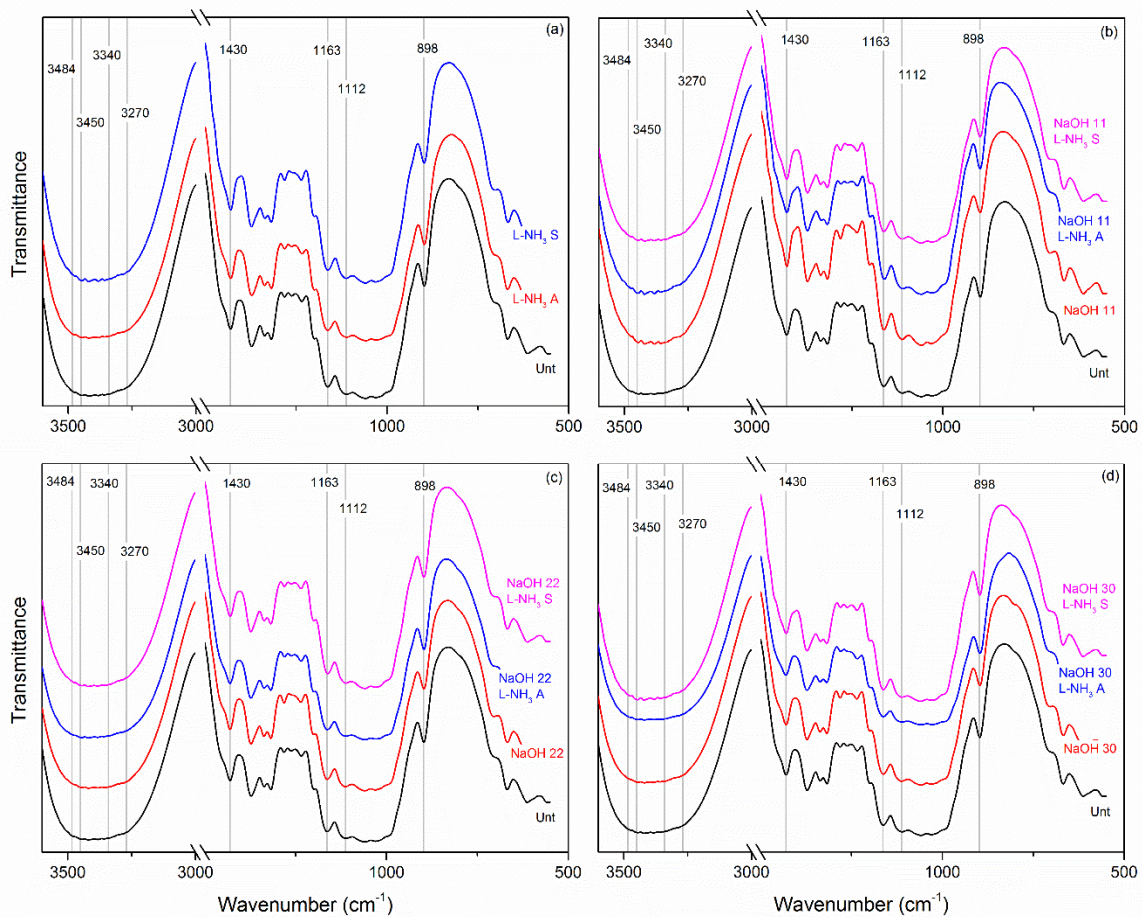

**Supplementary Figure 9.** FTIR transmittance measured with powder specimens from samples treated with (a) L-NH<sub>3</sub>, (b) 11% NaOH (w/w) + L-NH<sub>3</sub>, (c) 22% NaOH (w/w) + L-NH<sub>3</sub>, (d) 30% NaOH (w/w) + L-NH<sub>3</sub>.

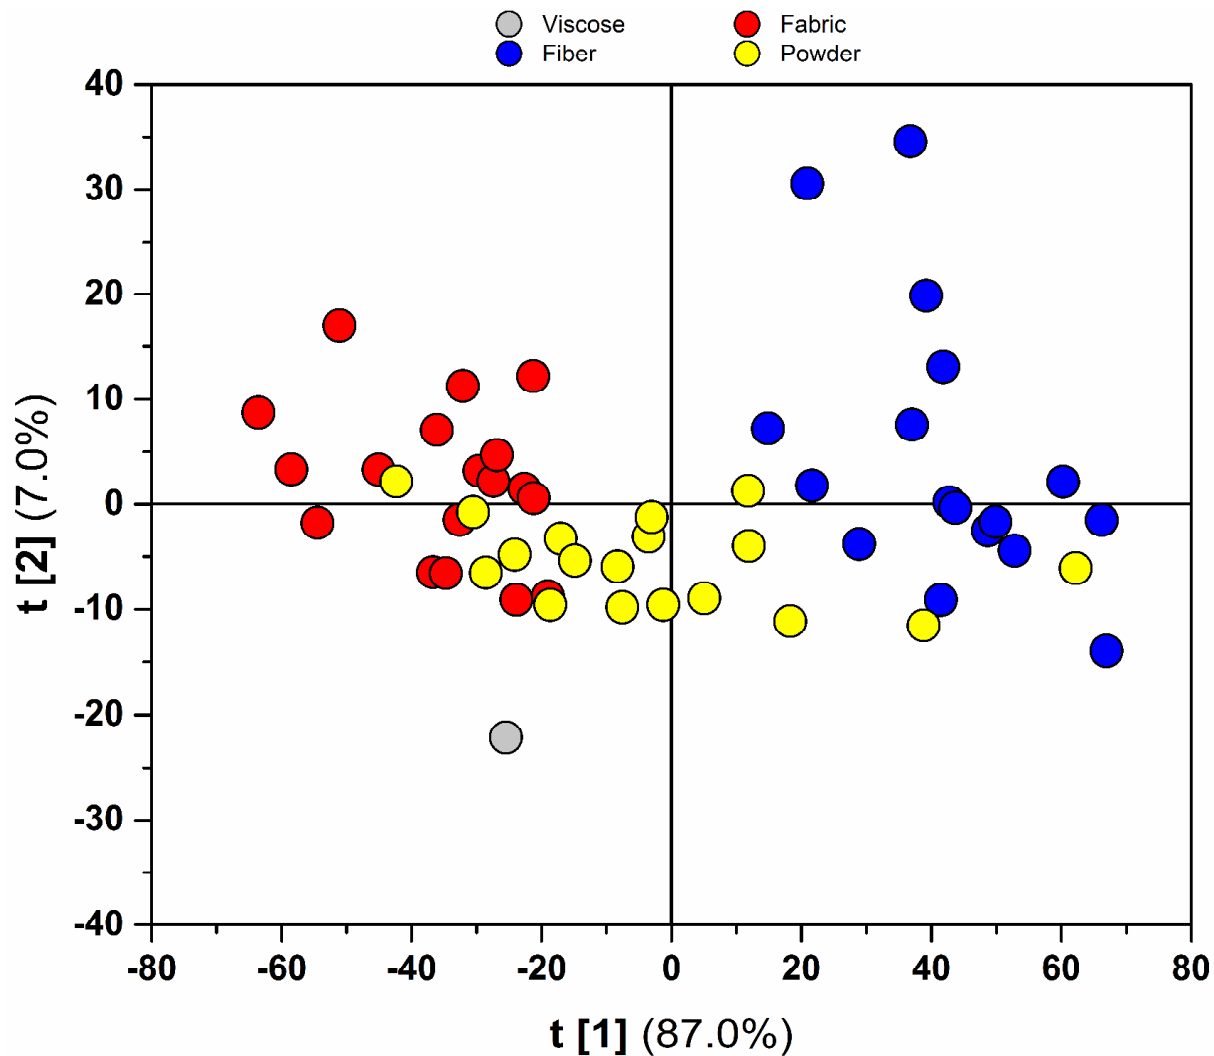

**Supplementary Figure 10.** Score-score plot of the first two PCs from a combined analysis of all measured diffractograms.

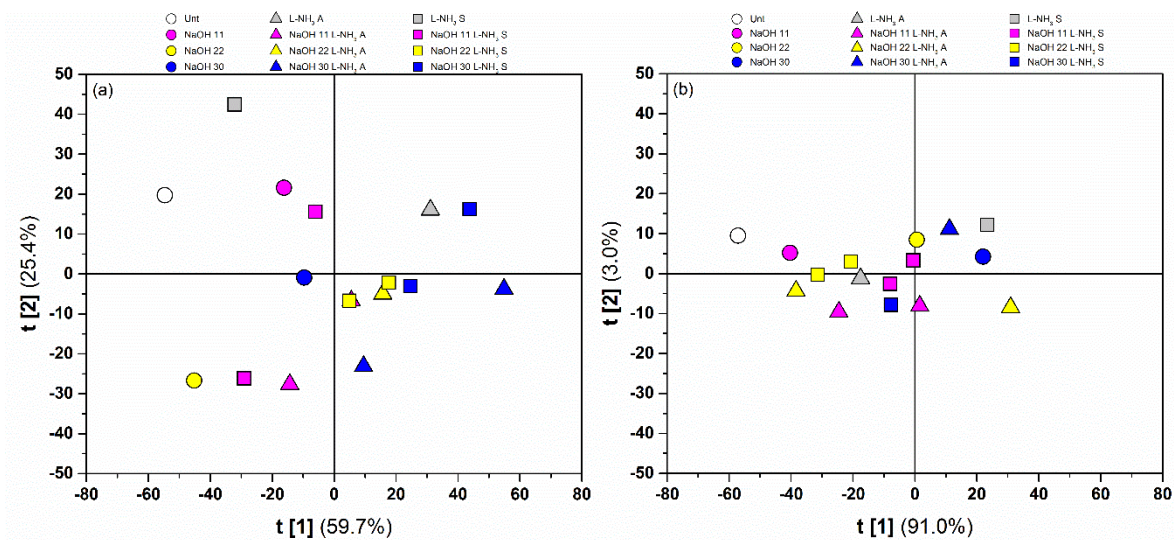

**Supplementary Figure 11.** Score-score plots of the first two PCs from analysis of diffractograms measured on (a) fiber and (b) powder specimens.

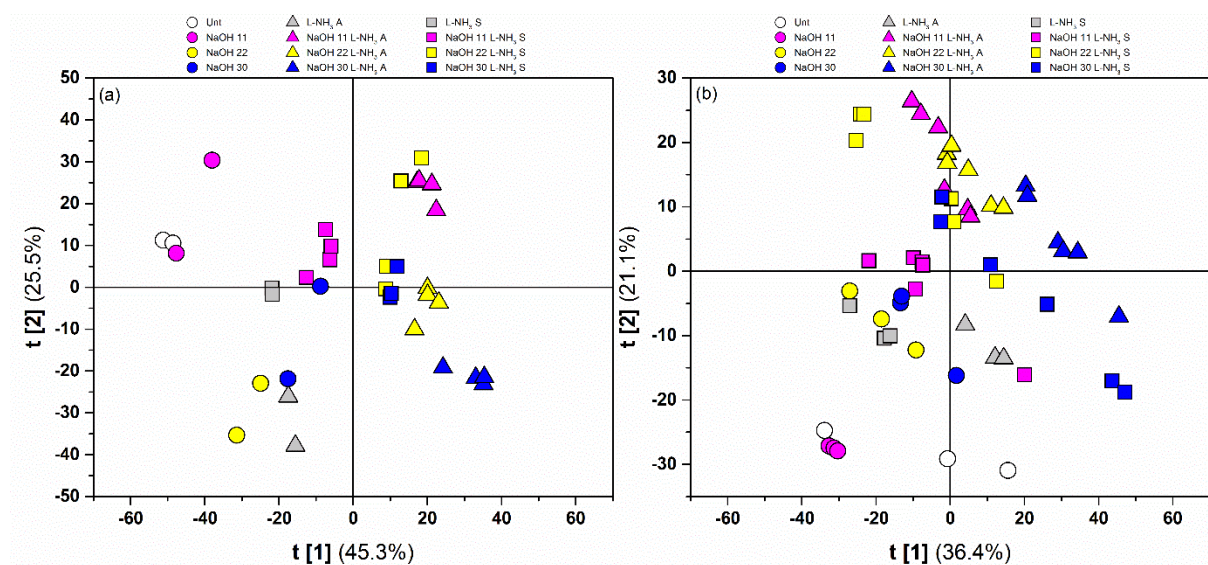

**Supplementary Figure 12.** Score-score plots of the first two PCs from analysis of the 1500–400  $\text{cm}^{-1}$  region in FTIR-ATR spectra measured on powder specimens from the (a) Invenio S and (b) Vertex 70 spectrometers.

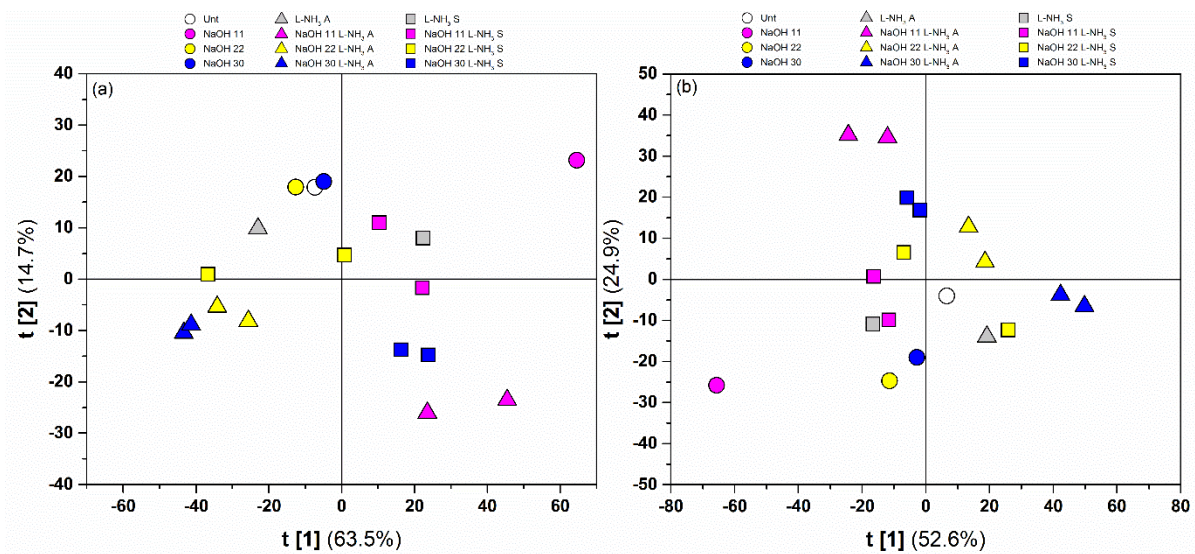

**Supplementary Figure 13.** Score-score plots of the first two PCs from analysis of FTIR transmittance spectra of the (a) 3675–2600 cm<sup>-1</sup> and (b) 1500–400 cm<sup>-1</sup> regions.
