# Supplementary material for: Distinguishing liquid ammonia from sodium hydroxide mercerization in cotton textiles
Source: Springer Nature journal article supplement (doi:10.1007/s10570-022-04532-7), 2022-03-25
Supplement: MOESM8 [file 20255794]

**Crystallite sizes estimated from the measured diffractograms**

| Sample                      | Fabric                                                          |       |       |         | Fiber  |       |       |         | Powder |       |       |         |
|-----------------------------|-----------------------------------------------------------------|-------|-------|---------|--------|-------|-------|---------|--------|-------|-------|---------|
|                             | Crystallite size perpendicular to the ( <i>hkl</i> ) planes (Å) |       |       |         |        |       |       |         |        |       |       |         |
|                             | (1-10)                                                          | (110) | (200) | Average | (1-10) | (110) | (200) | Average | (1-10) | (110) | (200) | Average |
| Unt                         | 69                                                              | 70    | 71    | 70      | 70     | 71    | 75    | 72      | 60     | 61    | 63    | 62      |
| NaOH 11                     | 67                                                              | 68    | 72    | 69      | 64     | 65    | 68    | 66      | 61     | 62    | 62    | 62      |
| NaOH 22                     | 64                                                              | 65    | 67    | 65      | 62     | 63    | 67    | 64      | 57     | 58    | 62    | 59      |
| NaOH30                      | 62                                                              | 63    | 67    | 64      | 57     | 57    | 61    | 58      | 56     | 57    | 60    | 58      |
| L-NH <sub>3</sub> A         | 54                                                              | 55    | 58    | 56      | 57     | 58    | 61    | 59      | 55     | 56    | 59    | 57      |
| NaOH 11 L-NH <sub>3</sub> A | 54                                                              | 55    | 59    | 56      | 58     | 59    | 62    | 60      | 53     | 53    | 53    | 53      |
| NaOH 22 L-NH <sub>3</sub> A | 54                                                              | 55    | 58    | 55      | 58     | 58    | 62    | 59      | 52     | 54    | 56    | 54      |
| NaOH 30 L-NH <sub>3</sub> A | 55                                                              | 56    | 59    | 57      | 56     | 57    | 60    | 58      | 47     | 46    | 49    | 47      |
| L-NH <sub>3</sub> S         | 59                                                              | 59    | 63    | 60      | 64     | 66    | 64    | 65      | 59     | 60    | 63    | 61      |
| NaOH 11 L-NH <sub>3</sub> S | 50                                                              | 51    | 54    | 52      | 58     | 58    | 61    | 59      | 56     | 56    | 57    | 56      |
| NaOH 22 L-NH <sub>3</sub> S | 52                                                              | 53    | 56    | 54      | 57     | 57    | 60    | 58      | 56     | 56    | 60    | 57      |
| NaOH 30 L-NH <sub>3</sub> S | 56                                                              | 56    | 58    | 57      | 58     | 59    | 63    | 60      | 55     | 56    | 59    | 56      |
