# Supplementary material for: Distinguishing liquid ammonia from sodium hydroxide mercerization in cotton textiles
Source: Springer Nature journal article supplement (doi:10.1007/s10570-022-04532-7), 2022-03-25
Supplement: MOESM9 [file 20255794]

Principal component analysis of X-ray diffraction truncated to the 2theta range of 10°–25° (min-max normalization, but no background correction)

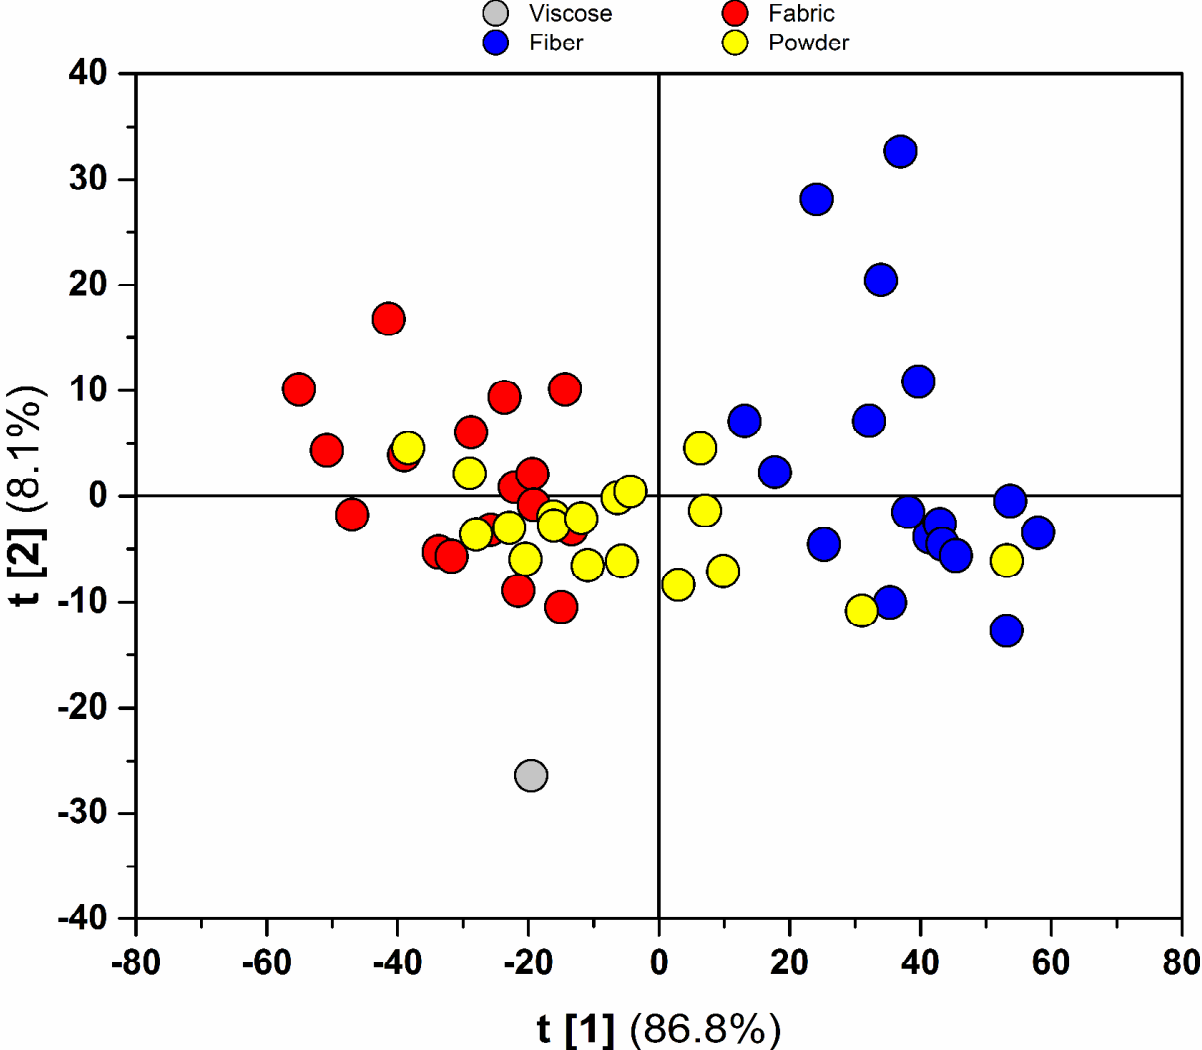

Score-score plots (first two principal components) from combined analysis of all measured diffractograms.

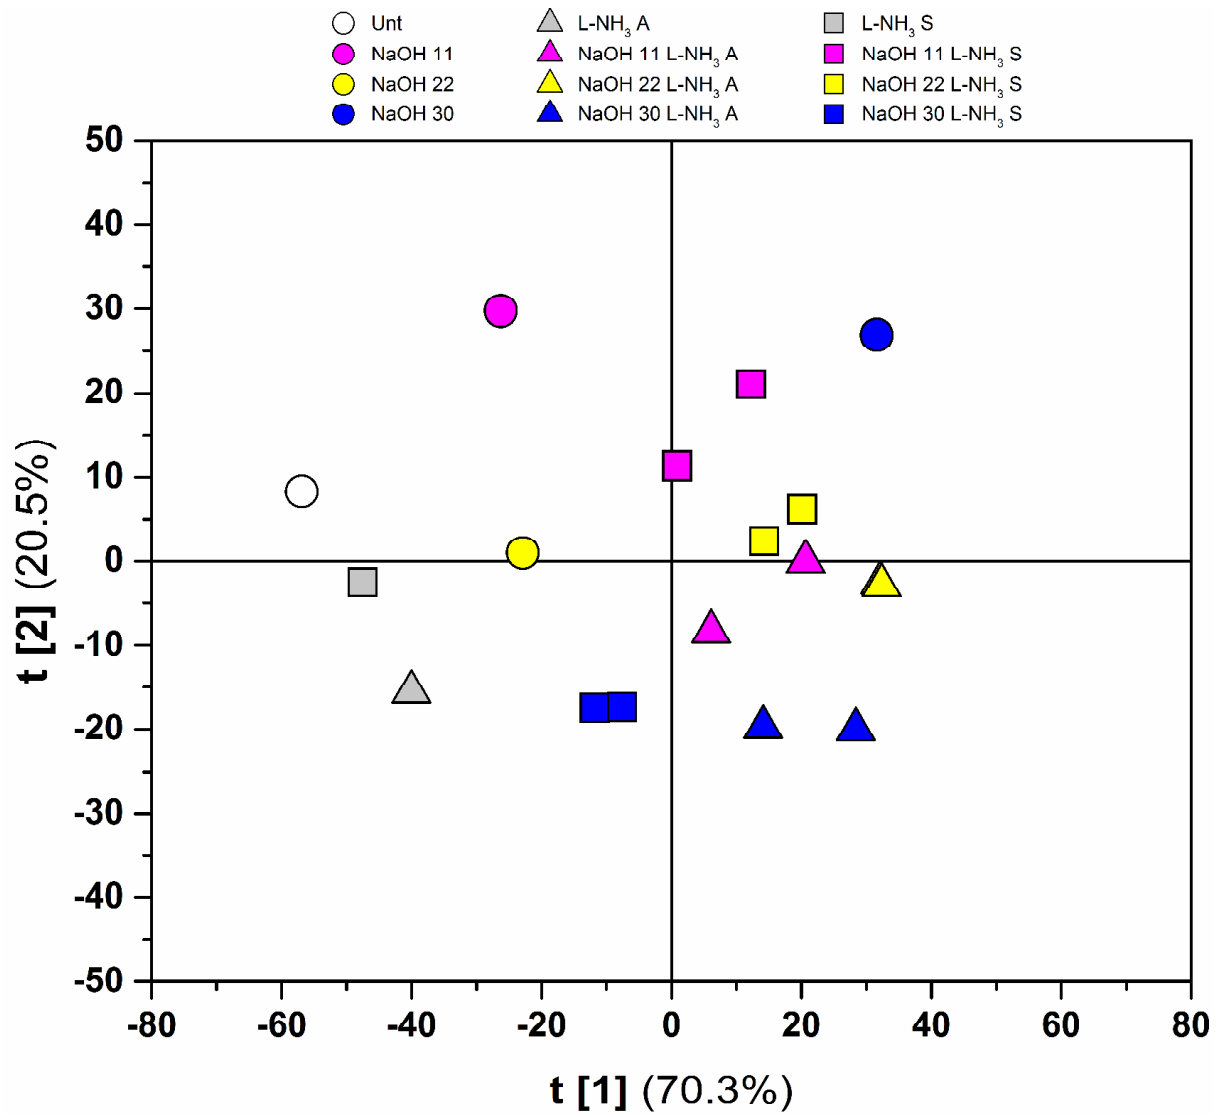

Score-score plots (first two principal components) from analysis of diffractograms measured on fabric specimens.

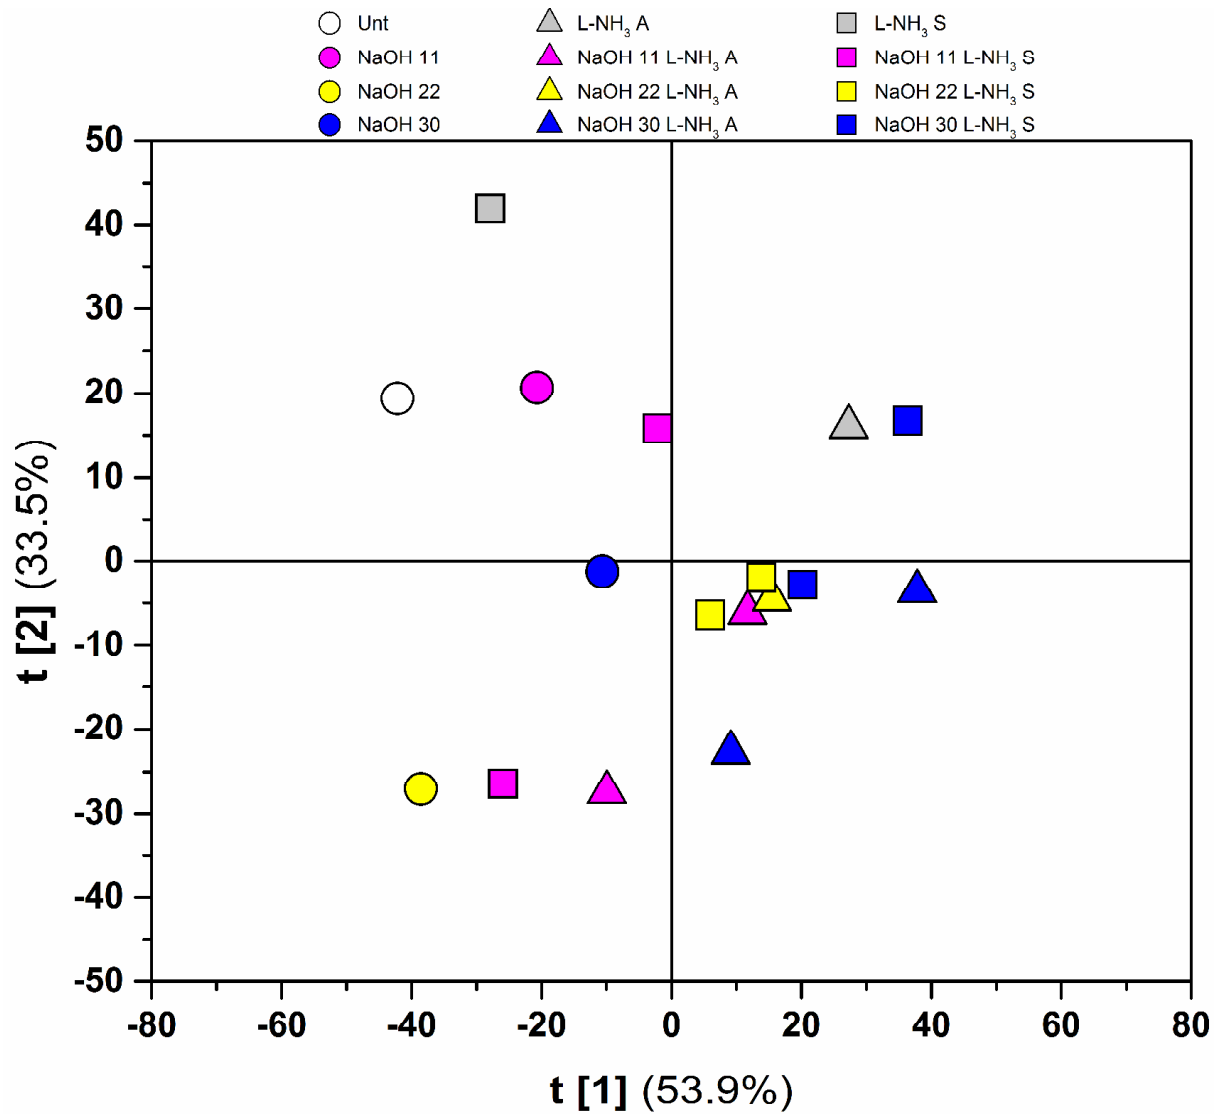

Score-score plots (first two principal components) from analysis of diffractograms measured on fiber specimens.

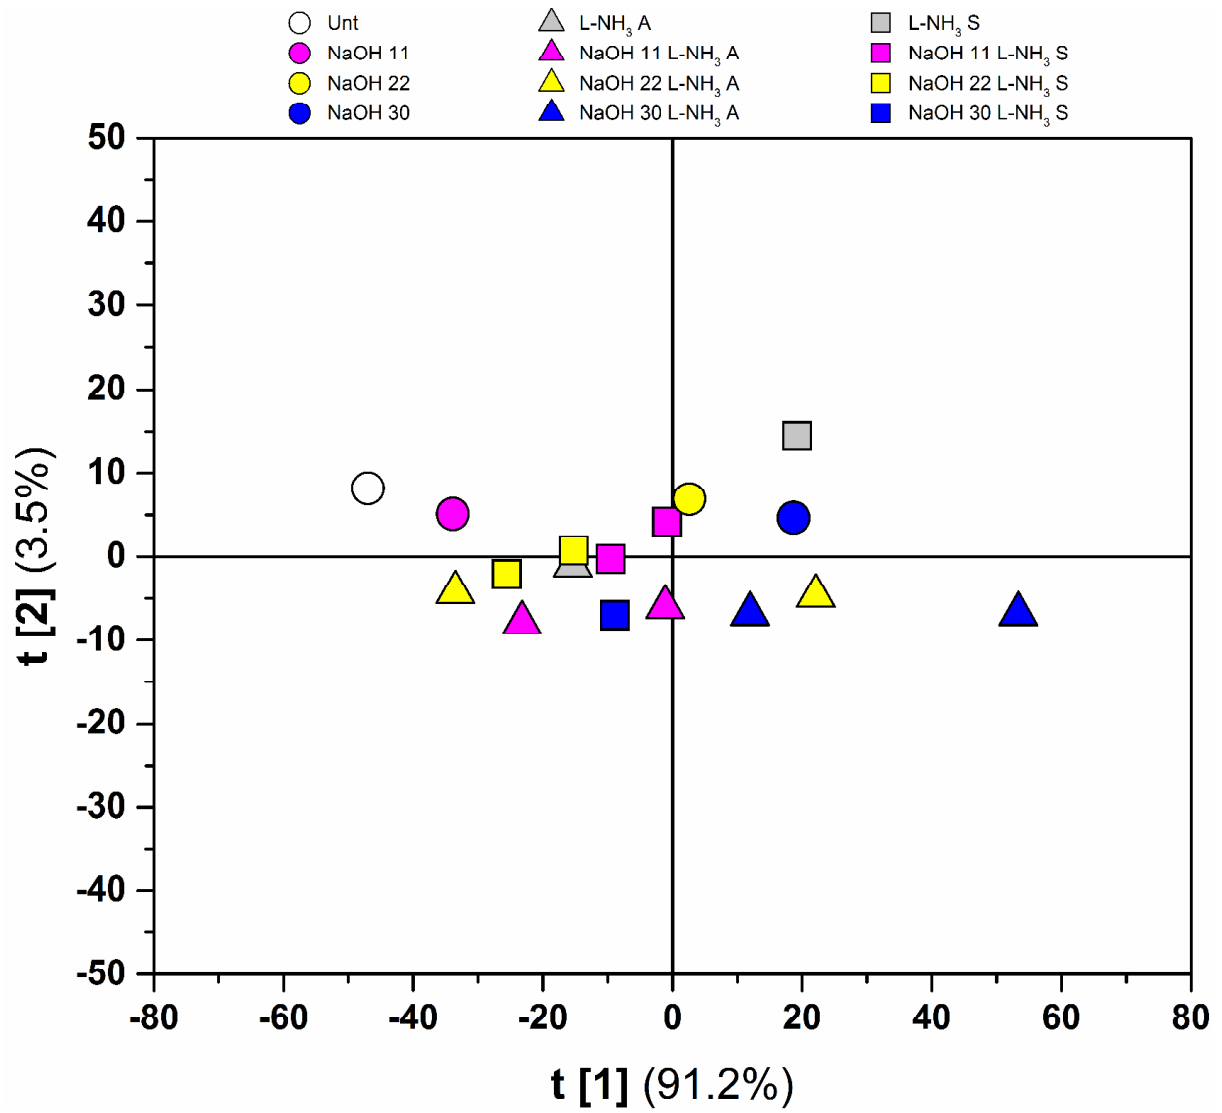

Score-score plots (first two principal components) from analysis of diffractograms measured on powder specimens.

Principal component analysis of X-ray diffraction in the 2theta range of 10°–30° (min-max normalization, with correction for measured background)

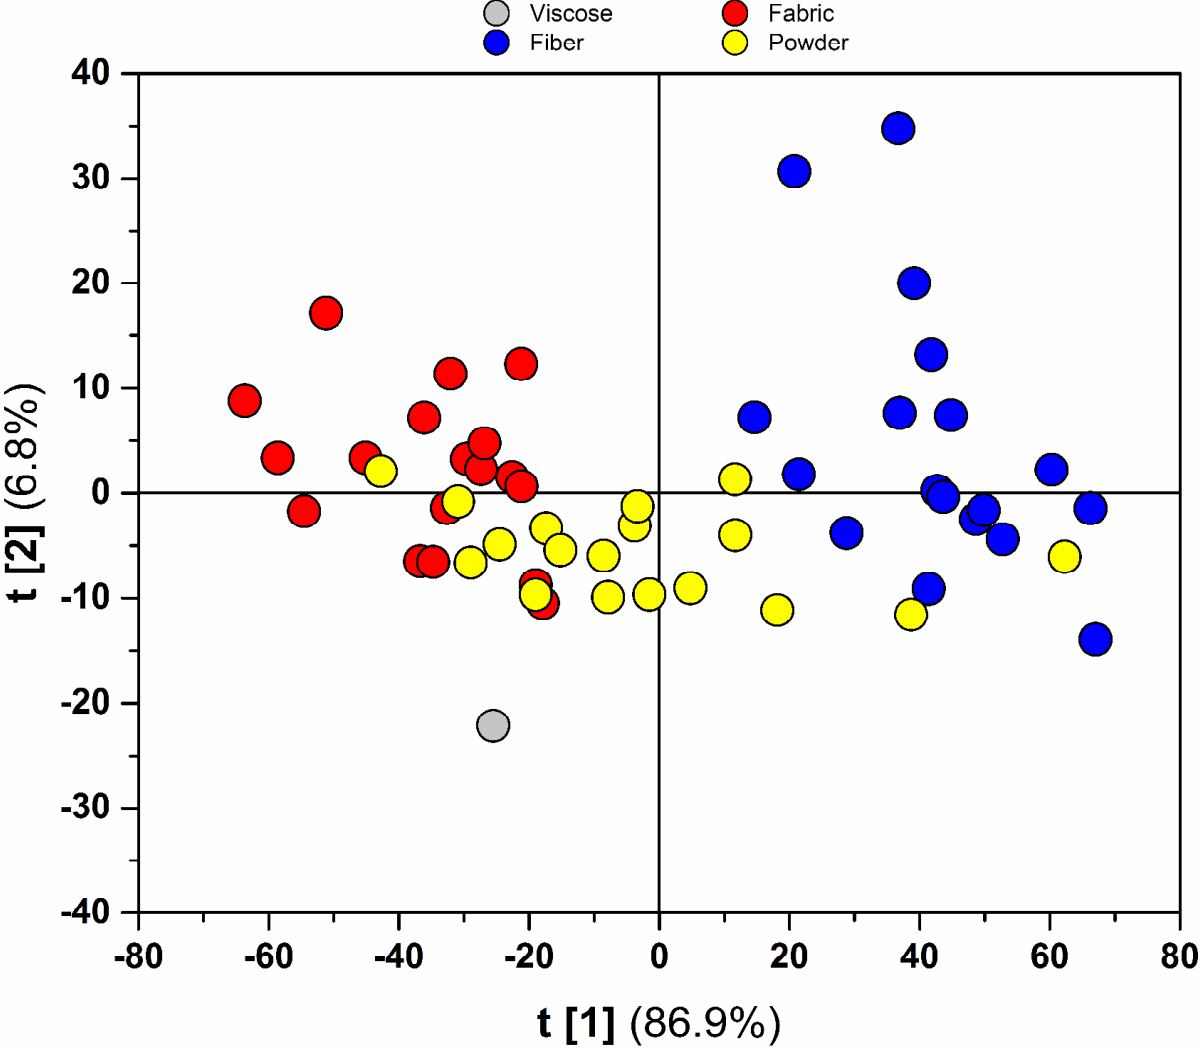

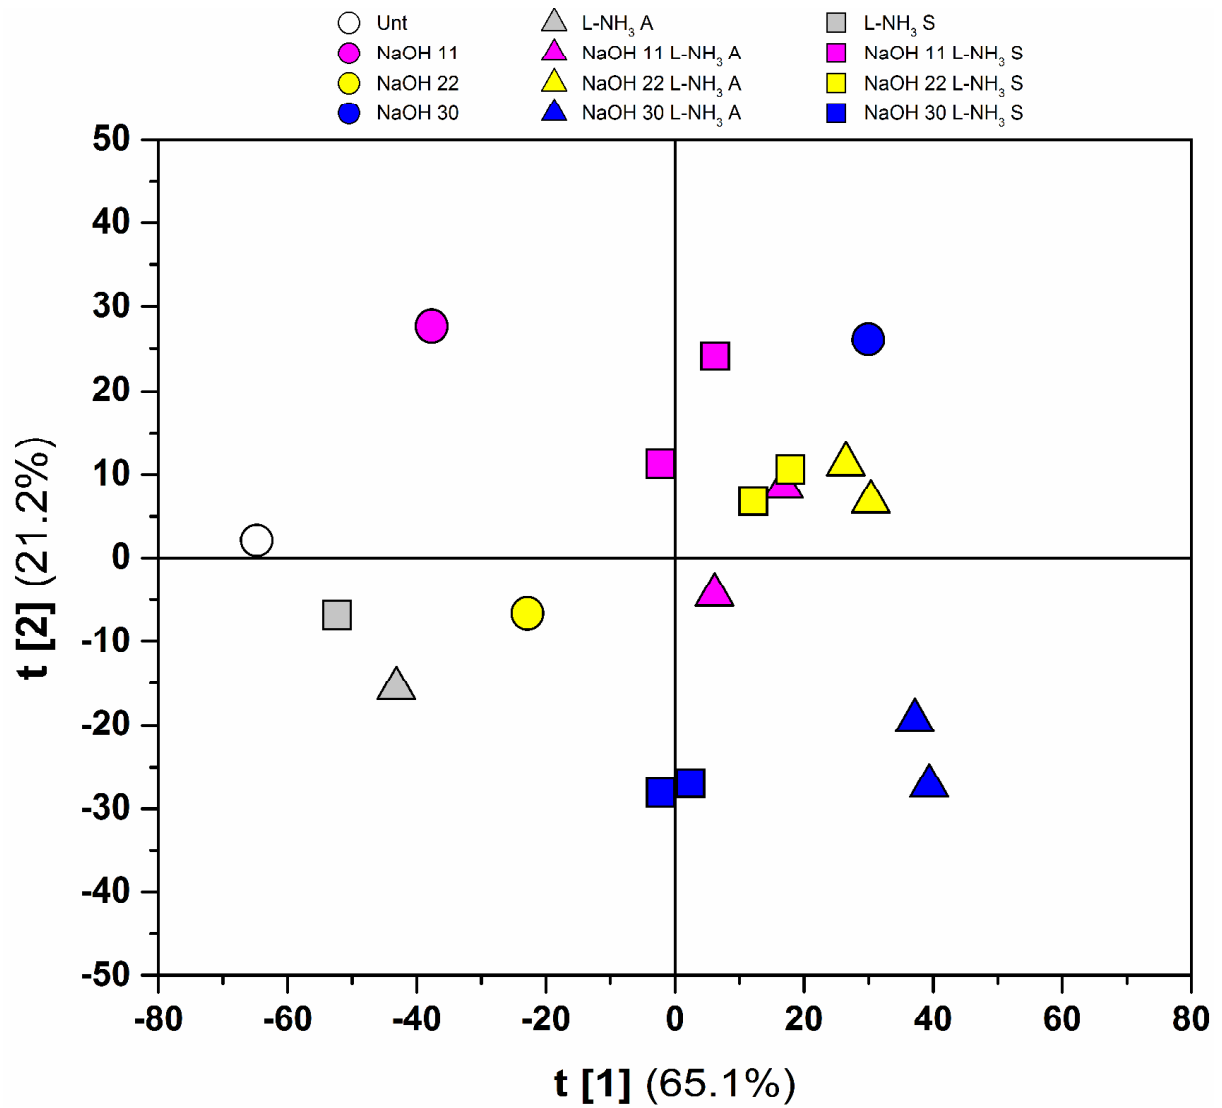

Score-score plots (first two principal components) from analysis of diffractograms measured on fabric specimens.

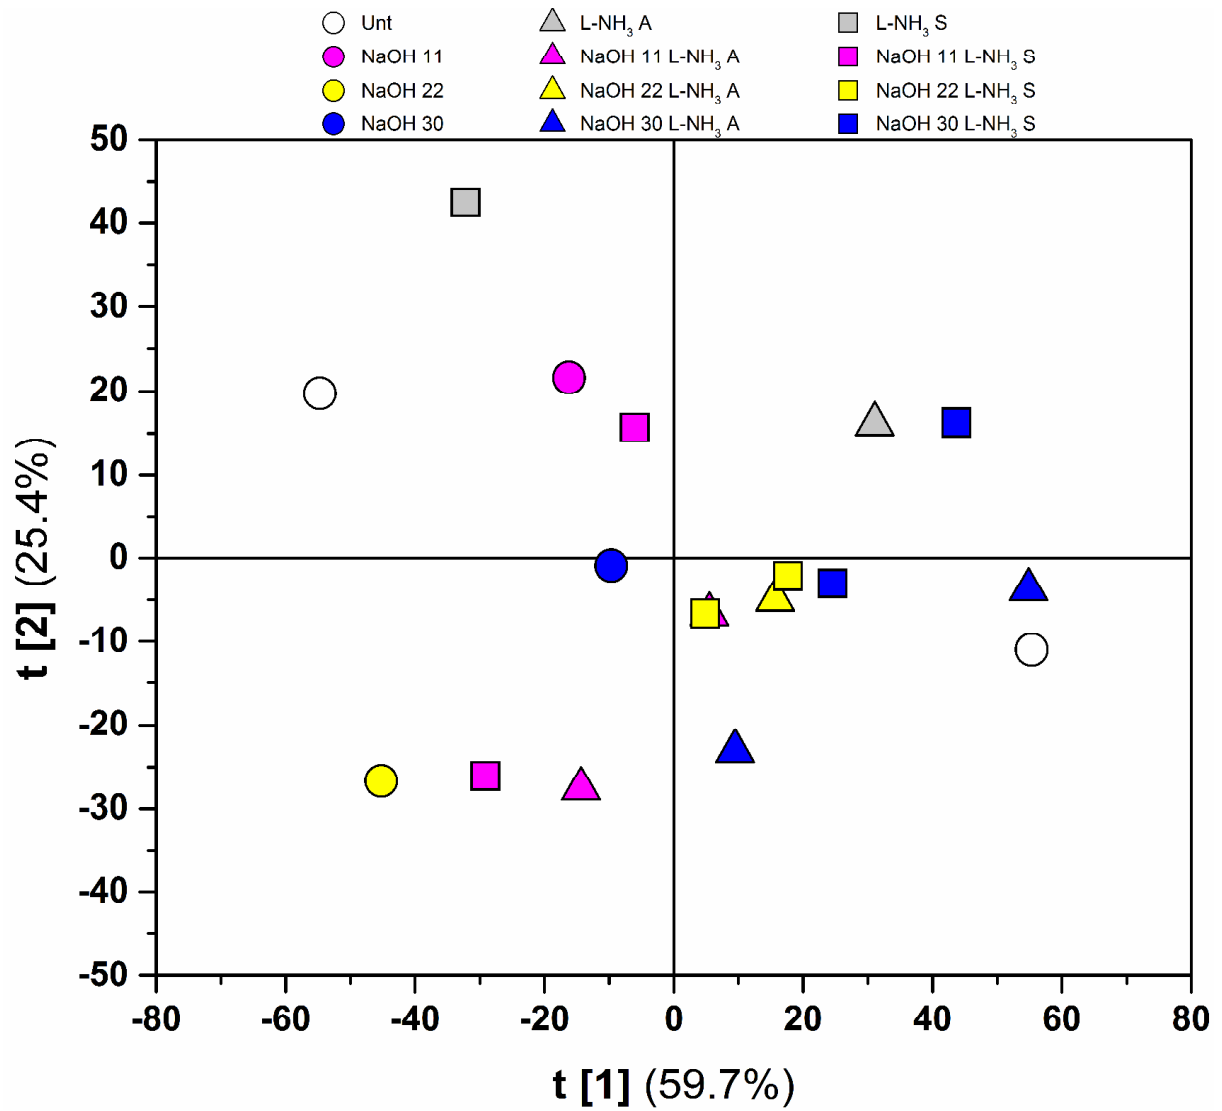

Score-score plots (first two principal components) from analysis of diffractograms measured on fiber specimens.

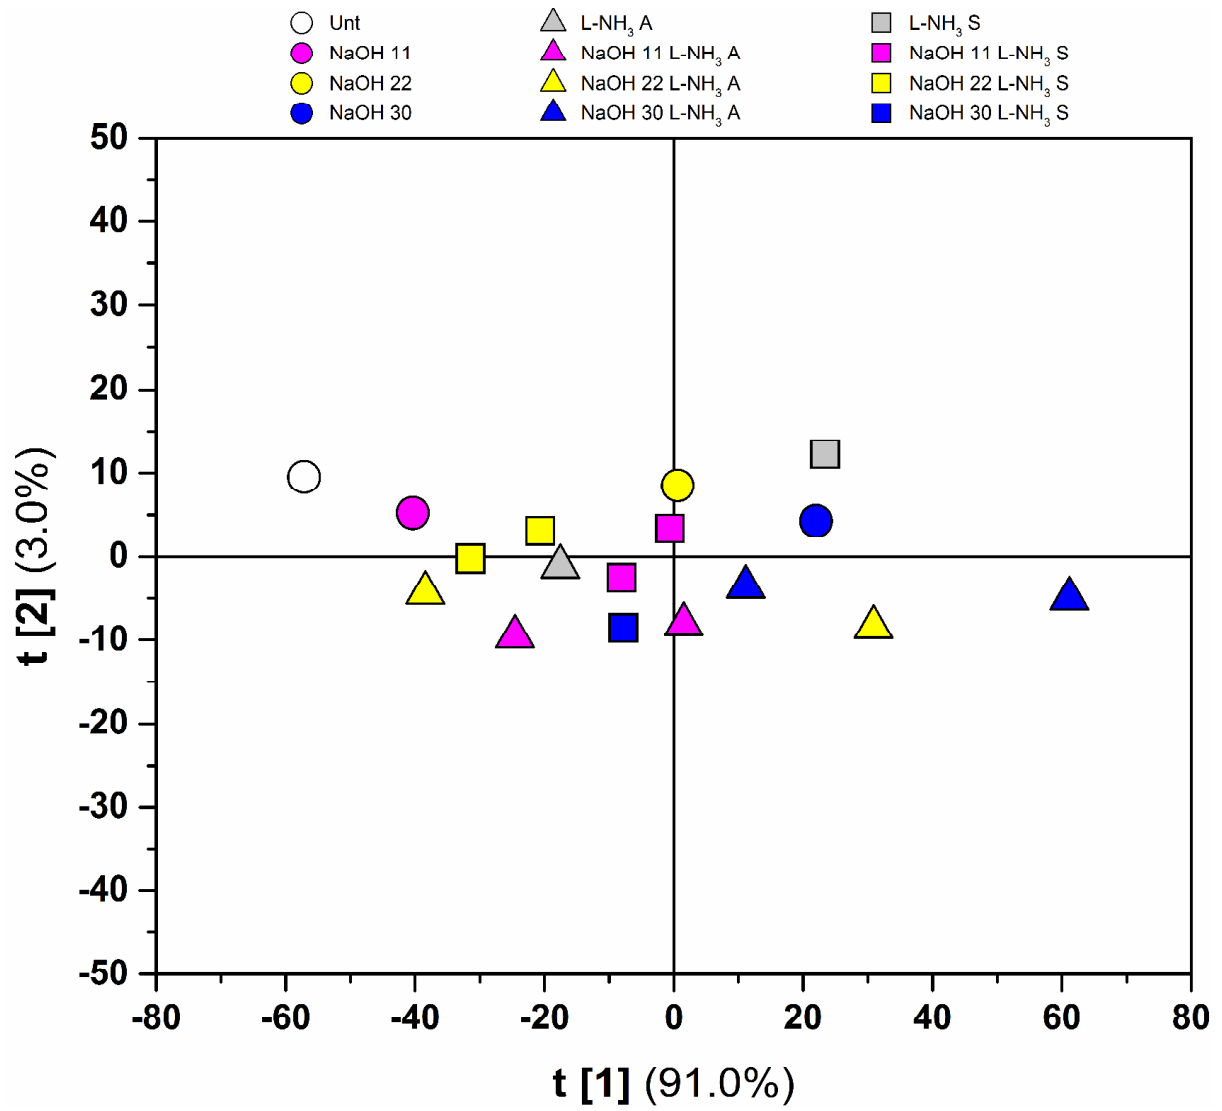

Score-score plots (first two principal components) from analysis of diffractograms measured on powder specimens.



Principal component analysis of X-ray diffraction in the 2theta range of 10°–30° (min-max normalization, with Multiplicative Scatter Correction (MSC) of background)

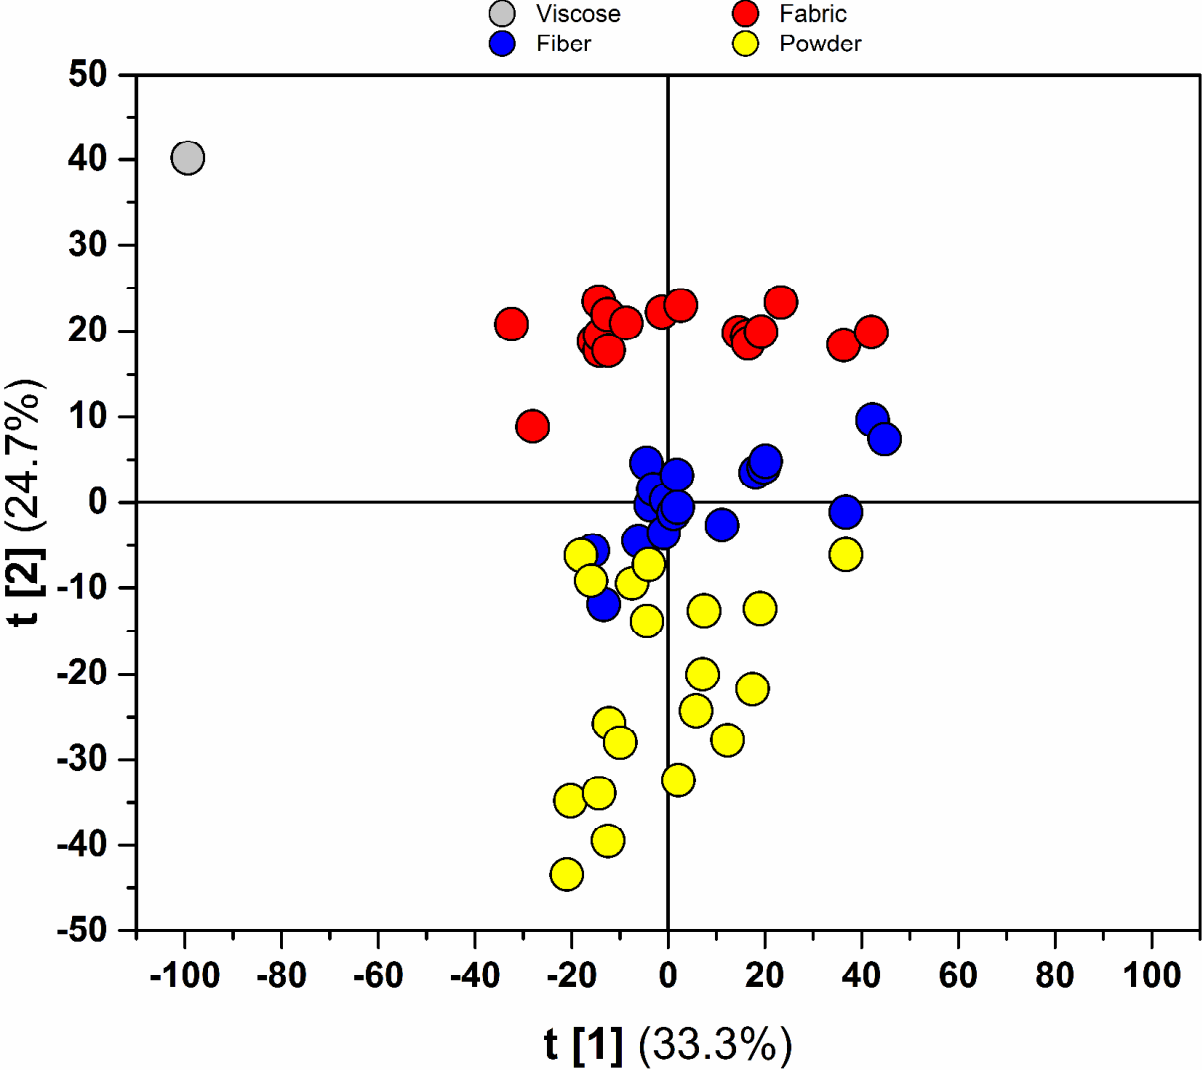

Score-score plots (first two principal components) from combined analysis of all measured diffractograms.



Score-score plots (first two principal components) from analysis of diffractograms measured on fabric specimens.

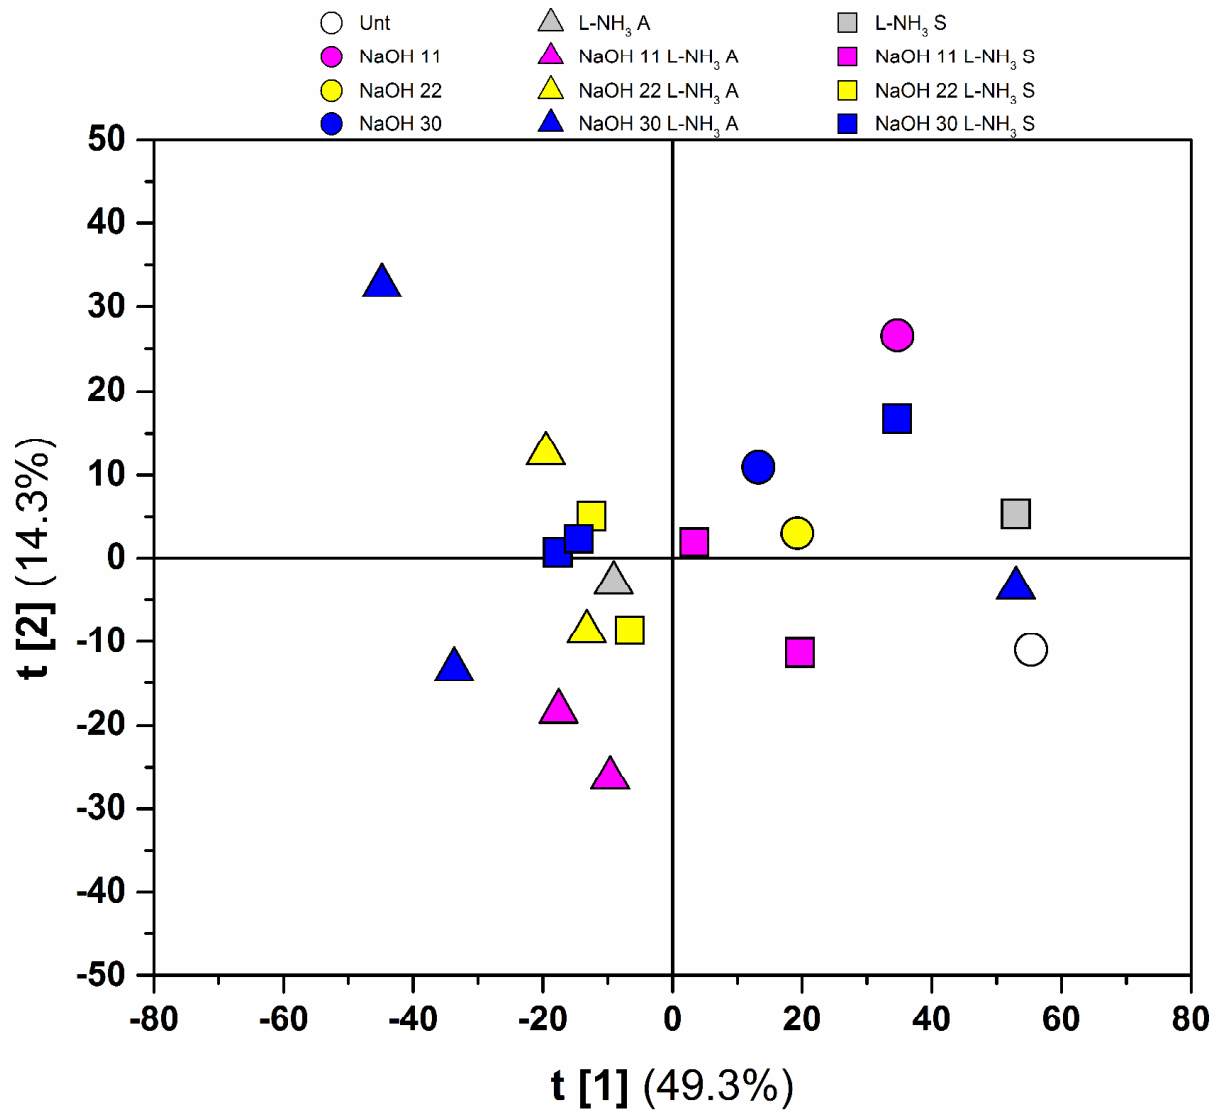

Score-score plots (first two principal components) from analysis of diffractograms measured on fiber specimens.

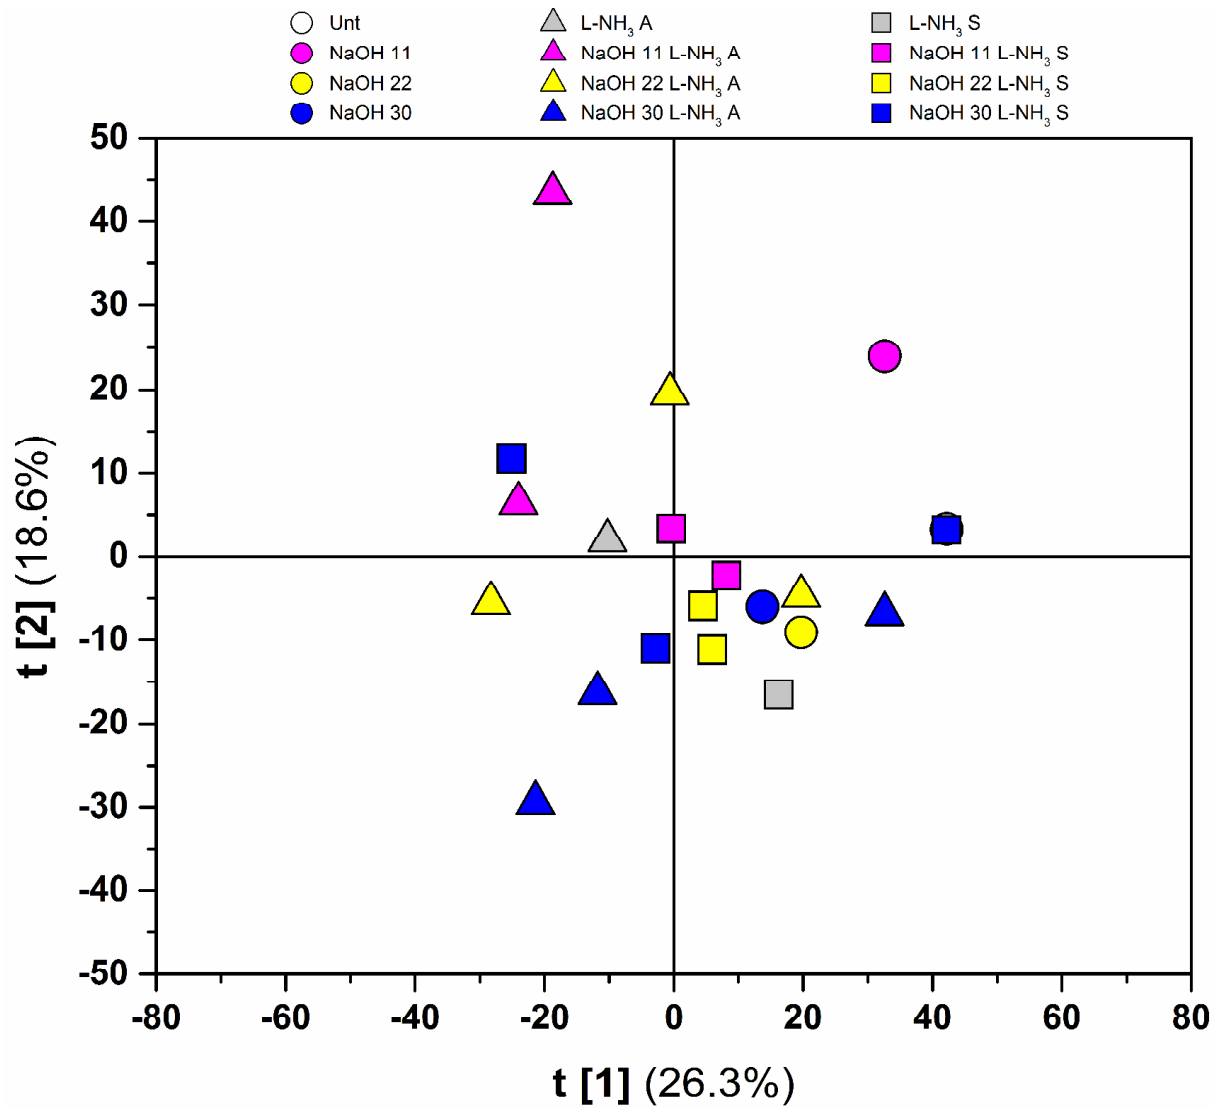

Score-score plots (first two principal components) from analysis of diffractograms measured on powder specimens.
